# Supplementary material
Source: publisher figshare collection journal article supplement (https://acs.figshare.com/ndownloader/files/4146505)
Supplement: Supplementary file 1 [file 4146505]

# New Synthetic Routes to Z-shape Functionalized Perylenes

Billa Bhargava Rao, Jun-Ru Wei and Chih-Hsiu Lin\*

*Institute of Chemistry, Academia Sinica, 128 Academia Road, Nankang, Taipei, Taiwan*

*E-mail: [chl@chem.sinica.edu.tw](mailto:chl@chem.sinica.edu.tw)*

## Supporting Material A

### Table of Contents

|                                                                                              |     |
|----------------------------------------------------------------------------------------------|-----|
| 1. Instruments and general experimental set-ups.....                                         | S2  |
| 2. Synthetic procedures and characterization data.....                                       | S3  |
| 3. UV and Fluorescence Spectra of <b>1a-h</b> , <b>2</b> , <b>3a</b> and <b>3b</b> .....     | S22 |
| 4. Cyclic voltammetry measurements of <b>1a-h</b> , <b>2</b> , <b>3a</b> and <b>3b</b> ..... | S28 |
| 5. Crystallographic Data (x-ray crystal packing structure of <b>3a</b> ).....                | S34 |
| 6. References.....                                                                           | S36 |

## 1. Instruments and General Experimental Set-ups:

Nuclear magnetic resonance spectra were taken on Bruker AMX-400 (400 MHz), Bruker AV-400 (400 MHz) or Bruker AV-500 (500 MHz) spectrometer. Chemical shifts were reported as delta scale in ppm relative to  $\text{CDCl}_3$  ( $\delta = 7.24$ ) or  $\text{DMSO}-d_6$  ( $\delta = 2.5$ ) for  $^1\text{H}$  NMR,  $\text{CDCl}_3$  ( $\delta = 77.0$ ) or  $\text{DMSO}-d_6$  ( $\delta = 39.5$ ) for  $^{13}\text{C}$  NMR. Data are reported as follows: chemical shift, multiplicity (s = singlet, d = doublet, t = triplet, q = quartet, br = broad, m = multiplet), integration, coupling constant (Hz). Infrared spectrum data were measured on a Thermo Nicolet Avatar 360 E.S.P. FT-IR spectrometer. Samples were pressed into KBr tablets or deposited on KBr pellets from  $\text{CH}_2\text{Cl}_2$  solutions. High resolution mass spectra were taken on JEOL JMS-700 10kV. Ultraviolet-visible electronic absorption spectra were recorded on a Hewlett–Packard 8453 diode array spectrophotometer. The samples were dissolved in dichloromethane and placed in a 1 cm quartz cell. The absorptions were monitored between 300–700 nm. Photoluminescence (PL) spectra were recorded on a Hitachi F-4500 spectrometer. Fluorescence quantum yields were determined using the integrating sphere method as described by de Mello et al.<sup>1</sup>. X-ray crystallography was performed on Bruker Ninium X8APEX. Cyclic voltammetry samples were prepared in dichloromethane solution with  $\text{TBAPF}_6$  as the supporting electrolyte. The measurements were carried out on Bio analytical system BAS1008 with a scan-rate of 100–150 mV/sec.

All reactions were performed under 1 atmosphere of dried nitrogen and well mixed with magnetic stirring devices. Reagent grade chemicals and solvents were used in all reactions. Reaction vessels were dried in oven before use. All reactions were monitored by TLC or  $^1\text{H}$  NMR. Analytical thin layer chromatography was performed on 250  $\mu\text{M}$  silica gel 60  $\text{F}_{254}$  plates. Detection was performed by illumination with a UV lamp (254 nm), staining with  $\text{I}_2$ , or PMA. Solvents for extraction, washing and chromatography were HPLC grade. Diethyl ether and tetrahydrofuran were distilled over metallic sodium with benzophenone radical anion as the indicator. Dichloromethane were distilled from  $\text{CaH}_2$ . Flash column chromatography was performed with Merck silica gel 60 (1.11567.9025, 0.040–0.063 mm) as the stationary phase. All ratios of reported mixed eluents were based on volume. Compound 1,5-diiodo-anthraquinone<sup>2</sup> was synthesized according to a known method.

## 2. Synthetic procedures and characterization data:

### 1,5-Distryryl anthraquinone:

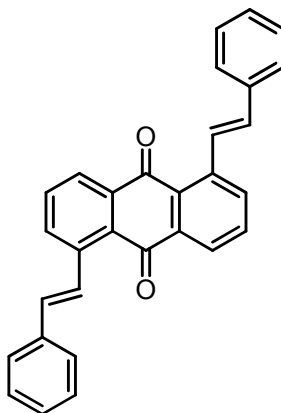

A mixture of 1,5-diiodo-anthraquinone (1.00 g, 2.17 mmol), styrene (1.12 mL, 10.85 mmol),  $(\text{MeCN})_2\text{PdCl}_2$  (0.11 g, 0.43 mmol), tetrabutylammonium bromide (1.74 g, 5.42 mmol) and triethylamine (2.0 mL) in dry toluene (20.0 mL) was heated at 100 °C under nitrogen for 24 h. The solvent was removed under reduced pressure. The crude product was purified by flash column chromatography (silica gel;  $\text{CH}_2\text{Cl}_2$ : hexane = 1:1) to give yellow solid product (520 mg, 64 %).

IR ( $\text{CH}_2\text{Cl}_2$ , cast)  $\nu$  ( $\text{cm}^{-1}$ ): 2959, 2872, 1662, 1578, 1463, 1320, 1272, 748;  $^1\text{H}$  NMR (500 MHz,  $\text{CDCl}_3$ )  $\delta$  (ppm): 8.34 (d, 2H,  $J = 16.3$  Hz), 8.26 (d, 2H,  $J = 7.8$  Hz), 7.96 (d, 2H,  $J = 7.8$  Hz), 7.74 (dd, 2H,  $J = 7.8$  Hz, 7.8 Hz), 7.63 (d, 4H,  $J = 7.5$  Hz), 7.39 (dd, 4H,  $J = 7.5$  Hz, 7.5 Hz), 7.30 (dd, 2H,  $J = 7.5$  Hz, 7.5 Hz), 7.05 (d, 2H,  $J = 16.3$  Hz);  $^{13}\text{C}$  NMR (100 MHz,  $\text{CDCl}_3$ )  $\delta$  (ppm): 185.30, 140.31, 137.26, 136.27, 133.48, 133.12, 132.86, 129.23, 128.75, 128.56, 128.14, 127.24, 127.09; HR-EI-MS. ( $\text{M}^+$ ),  $\text{C}_{30}\text{H}_{20}\text{O}_2$ , Calc.: 412.1463; Found: 412.1470

### Anthraquinone-1,5-dicarbaldehyde (5):

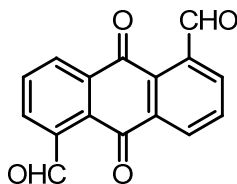

1, 5-distyryl anthraquinone (1.00 g, 2.42 mmol) was dissolved in dichloromethane (200 mL) and cooled to -78 °C. O<sub>3</sub>/O<sub>2</sub> gas was bubbled through the solution for 10 minutes at -78 °C. Then nitrogen was bubbled through the solution for further 5 minutes to remove excess ozone before the reaction was quenched with dimethyl sulfide (3.0 mL). The reaction was warmed to room temperature over the course of 1 h and stirring was continued for 12 h. The solution was concentrated at reduced pressure. The crude product obtained was washed with methanol (10.0 mL) and a precipitation started to form. The solid was filtered to give brown colored product (0.50 g, 78 %) which was used in the subsequent steps without further purification.

IR (CH<sub>2</sub>Cl<sub>2</sub>, cast)  $\nu$  (cm<sup>-1</sup>): 2870, 1791, 1665, 1570, 1322, 1287, 1238, 820; <sup>1</sup>H NMR (500 MHz, CDCl<sub>3</sub>)  $\delta$  (ppm): 10.81 (s, 2H), 8.52 (dd, 2H, *J* = 1.5 Hz, 7.8 Hz), 8.15 (dd, 2H, *J* = 1.5 Hz, 7.8 Hz), 7.94 (dd, 2H, *J* = 7.8 Hz, 7.8 Hz); <sup>13</sup>C NMR (125 MHz, CDCl<sub>3</sub>)  $\delta$  (ppm): 192.17, 183.70, 138.83, 134.59, 134.32, 134.08, 132.51, 131.55; HR-EI-MS. (M<sup>+</sup>), C<sub>16</sub>H<sub>8</sub>O<sub>4</sub>, Calc.: 264.0423; Found: 264.0430

#### **General procedure A for perylene ring formation reactions:**

Electron deficient olefins (fumaronitrile, diethyl maleate, or N-dodecyl maleimide, 2.35 mmol) were dissolved in dry dichloromethane (2.0 mL) and the solutions were cooled to 0 °C. Triethyl phosphine (1.0 M in THF, 2.0 mL, 2.00 mmol) was slowly added at this temperature. The reaction mixture was stirred at the same temperature for 10 min. To this solution, anthraquinone-1,5-dicarbaldehyde (0.25 g, 0.94 mmol) in dry dichloromethane (10.0 mL) was slowly added. The reaction mixture was allowed to warm to room temperature and stirred for 2 h. The reaction mixture was cooled again to 0 °C, and 1,8-diazabicyclo[5,4,0]undec-7-ene (DBU, 2.35 mmol) was slowly added. The reaction was then warmed back to room temperature and stirred for 2 h before quenched with cold water. The organic layer was separated and aqueous layer was extracted with dichloromethane (3 x 50 mL). The combined organic phases was dried over MgSO<sub>4</sub>. After concentrated in vacuum, the crude product was purified by silica gel column to give the desired perylene products.

#### **Perylene-1,2,7,8-bis(1'-dodecyl-1*H*-pyrrole-2'5'-dione) (1a):**

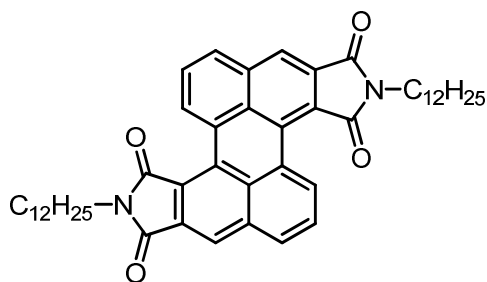

General procedure A was followed by using N-dodecyl-maleimide (0.62 g, 2.35 mmol) and anthraquinone-1,5-dicarbaldehyde (0.25 g, 0.94 mmol) as substrates. The crude product was purified by flash column chromatography (silica gel; CH<sub>2</sub>Cl<sub>2</sub>: hexane = 2: 3) to furnish the perylene bisimide (440 mg, 65 %).

IR (CH<sub>2</sub>Cl<sub>2</sub>, cast)  $\nu$  (cm<sup>-1</sup>): 3784, 2920, 2850, 1752, 1696, 1101, 802, 750; <sup>1</sup>H NMR (400 MHz, CDCl<sub>3</sub>)  $\delta$  (ppm): 9.16 (d, 2H, *J* = 7.4 Hz), 8.32 (s, 2H), 8.09 (d, 2H, *J* = 7.4 Hz), 7.83 (dd, 2H, *J* = 7.4 Hz, 7.4 Hz), 3.78 (t, 4H, *J* = 7.6 Hz), 1.76-1.69 (m, 4H), 1.34-1.22 (m, 36H), 0.84 (t, 6H, *J* = 7.0 Hz); <sup>13</sup>C NMR (125 MHz, CDCl<sub>3</sub>)  $\delta$  (ppm): 168.35, 167.20, 134.74, 133.31, 132.70, 132.58, 132.11, 130.49, 128.71, 128.68, 123.91, 123.17, 38.78, 31.89, 29.69, 29.61, 29.56, 29.50, 29.32, 29.23, 28.51, 27.00, 22.66, 14.08; UV/Vis (CH<sub>2</sub>Cl<sub>2</sub>):  $\lambda_{\text{max}}$  = 420, 452 and 482 nm, Fluorescence (CH<sub>2</sub>Cl<sub>2</sub>,  $\lambda_{\text{ex}}$  = 482 nm):  $\lambda_{\text{em}}$  = 500, 533 and 577 nm,  $\Phi_{\text{F}}$  = 0.36; HR-EI-MS. (*M*<sup>+</sup>), C<sub>48</sub>H<sub>58</sub>N<sub>2</sub>O<sub>4</sub>, Calc.: 726.4397; Found: 726.4400

#### Perylene-1,2,7,8-tetracarbonitrile (**1b**):

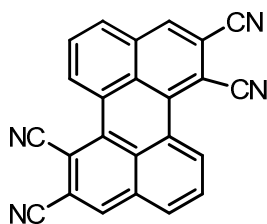

General procedure A was followed by using fumaronitrile (0.18 g, 2.35 mmol) and anthraquinone-1,5-dicarbaldehyde (0.25 g, 0.94 mmol) as the substrates. The crude product was purified by flash column chromatography (silica gel; CH<sub>2</sub>Cl<sub>2</sub>) to furnish the desired compound (135 mg, 40 %).

IR (CH<sub>2</sub>Cl<sub>2</sub>, cast)  $\nu$  (cm<sup>-1</sup>): 2920, 2850, 2215, 1718, 1580, 1260, 899, 799; <sup>1</sup>H NMR (500 MHz, DMSO-d<sub>6</sub>)  $\delta$  (ppm): 9.24 (d, 2H,  $J$  = 8.0 Hz), 8.98 (s, 2H), 8.39 (d, 2H,  $J$  = 8.0 Hz), 8.17 (dd, 2H,  $J$  = 8.0 Hz, 8.0 Hz); <sup>13</sup>C NMR (125 MHz, DMSO-d<sub>6</sub>, the spectrum is poor quality due to low solubility)  $\delta$  (ppm): 136.11, 135.57, 134.99, 132.97, 132.00, 130.68, 130.55, 128.56, 126.88, 117.97, 116.34, 113.36; UV/Vis (CH<sub>2</sub>Cl<sub>2</sub>):  $\lambda_{\text{max}}$  = 406, 430 and 457 nm, Fluorescence (CH<sub>2</sub>Cl<sub>2</sub>,  $\lambda_{\text{ex}}$  = 457 nm):  $\lambda_{\text{em}}$  = 475, 503 and 542 nm,  $\Phi_{\text{F}}$  = 0.38; HR-EI-MS. (M<sup>+</sup>), C<sub>24</sub>H<sub>8</sub>N<sub>4</sub>, Calc.: 352.0749; Found: 352.0748

**Tetraethyl perylene-1,2,7,8-tetracarboxylate (1c):**

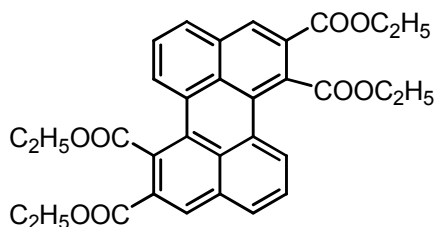

General procedure A was followed by using diethyl maleate (0.40 mL, 2.35 mmol) and anthraquinone-1,5-dicarbaldehyde (0.25 g, 0.94 mmol) as the substrates. The crude product was purified by flash column chromatography (silica gel; CH<sub>2</sub>Cl<sub>2</sub>) to furnish the desired compound (101 mg, 23 %).

IR (CH<sub>2</sub>Cl<sub>2</sub>, cast)  $\nu$  (cm<sup>-1</sup>): 2981, 1723, 1370, 1264, 1194, 1154, 1026, 751; <sup>1</sup>H NMR (500 MHz, CDCl<sub>3</sub>)  $\delta$  (ppm): 8.43 (s, 2H), 8.14 (d, 2H,  $J$  = 8.0 Hz), 7.90 (d, 2H,  $J$  = 8.0 Hz), 7.60 (dd, 2H,  $J$  = 8.0 Hz, 8.0 Hz), 4.45-4.38 (m, 8H), 1.43 (t, 6H,  $J$  = 7.3 Hz), 1.26 (t, 6H,  $J$  = 7.3 Hz); <sup>13</sup>C NMR (125 MHz, CDCl<sub>3</sub>)  $\delta$  (ppm): 170.59, 166.30, 132.17, 130.99, 130.75, 129.65, 129.23, 129.20, 128.72, 128.55, 128.33, 127.58, 62.08, 61.79, 14.23, 13.71; UV/Vis (CH<sub>2</sub>Cl<sub>2</sub>):  $\lambda_{\text{max}}$  = 385, 406 and 429 nm, Fluorescence (CH<sub>2</sub>Cl<sub>2</sub>,  $\lambda_{\text{ex}}$  = 429 nm):  $\lambda_{\text{em}}$  = 486 nm,  $\Phi_{\text{F}}$  = 0.07; HR-ESI-MS. (M+Na)<sup>+</sup>, (C<sub>32</sub>H<sub>28</sub>O<sub>8</sub>Na)<sup>+</sup>, Calc.: 563.1682; Found: 563.1646

**General procedure B for perylene ring formation reactions:**

Three reactions were merged into a one pot procedure. Initially, the first electron deficient olefin (0.94 mmol) was dissolved in dry dichloromethane (2.0 mL) and the solution was cooled to 0 °C. Triethyl phosphine (1.0 M in THF, 1.0 mL, 1.00 mmol) was slowly added at this

temperature. The reaction mixture was stirred at the same temperature for 10 min. To this solution, anthraquinone-1,5-dicarbaldehyde (0.25 g, 0.94 mmol) in dry dichloromethane (10.0 mL) was slowly added. The reaction mixture was allowed to warm to room temperature and stirred for 2 h.

A second electron deficient olefin (0.94 mmol) was likewise dissolved in dry dichloromethane (2.0 mL) and treated with triethyl phosphine (1.0 M in THF, 1.0 mL, 1.00 mmol) at 0 °C. This was stirred at the same temperature for 10 min. This reaction solution was slowly added to the above reaction mixture at 0 °C. The reaction mixture was again warmed back to room temperature and stirred for another 2 h.

The reaction mixture was again cooled to 0 °C and DBU (2.35 mmol) was then slowly added. The reaction was again warmed back to room temperature and stirred for 2 h before quenched with cold water. The organic layer was separated and aqueous layer was further extracted with dichloromethane (3 x 50 mL). The combined organic phases was dried over MgSO<sub>4</sub>. After concentrated in vacuum, the crude product was purified by silica gel column to give the desired perylene compound.

**Perylene-7,8-dicarbonitrile-1,2-(1'-dodecyl-1*H*-pyrrole-2'5'-dione) (1d):**

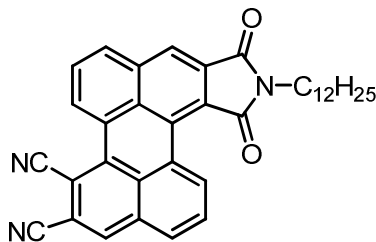

General procedure B was followed by using the N-dodecyl-maleimide (0.25 g, 0.94 mmol) as the first electron deficient olefin and fumaronitrile (0.07 g, 0.94 mmol) as the second. The crude product was purified by column chromatography (silica gel; CH<sub>2</sub>Cl<sub>2</sub>: hexane = 2: 3) to furnish the desired compound (122 mg, 23 %).

IR (CH<sub>2</sub>Cl<sub>2</sub>, cast)  $\nu$  (cm<sup>-1</sup>): 3077, 2920, 2853, 2224, 1752, 1700, 800, 755; <sup>1</sup>H NMR (500 MHz, CDCl<sub>3</sub>)  $\delta$  (ppm): 9.32 (d, 1H, *J* = 7.8 Hz), 9.20 (d, 1H, *J* = 8.0 Hz), 8.37 (s, 1H), 8.30 (s, 1H), 8.16 (d, 1H, *J* = 7.8 Hz), 8.03 (d, 1H, *J* = 8.0 Hz), 7.93 (dd, 1H, *J* = 7.8 Hz), 7.89 (dd, 1H, *J* = 8.0

Hz), 3.78 (t, 2H,  $J = 7.1$  Hz), 1.73-1.70 (m, 2H), 1.33-1.22 (m, 18H), 0.84 (t, 3H, 7.1 Hz);  $^{13}\text{C}$  NMR (125 MHz,  $\text{CDCl}_3$ )  $\delta$  (ppm): 168.04, 166.81, 137.01, 135.18, 134.83, 134.57, 133.01, 132.92, 132.16, 131.51, 131.01, 130.61, 130.21, 129.79, 129.62, 129.43, 128.87, 127.53, 124.39, 124.08, 117.93, 116.06, 114.09, 105.37, 38.91, 31.89, 29.69, 29.61, 29.55, 29.48, 29.32, 29.21, 28.45, 26.97, 22.66, 14.09; UV/Vis ( $\text{CH}_2\text{Cl}_2$ ):  $\lambda_{\text{max}} = 416, 441$  and  $468$  nm, Fluorescence ( $\text{CH}_2\text{Cl}_2$ ,  $\lambda_{\text{ex}} = 468$  nm):  $\lambda_{\text{em}} = 487, 517$  and  $561$  nm,  $\Phi_{\text{F}} = 0.55$ ; HR-FAB-MS. ( $\text{M}+\text{H}^+$ ),  $\text{C}_{36}\text{H}_{34}\text{N}_3\text{O}_2$ , Calc.: 540.2651; Found: 540.2645

**Diethyl-7,8-(1'-dodecyl-1H-pyrrole-2',5'-dione)perylene-1,2-dicarboxylate (1e):**

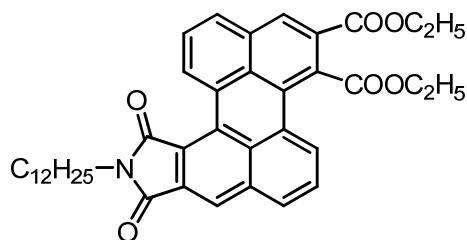

General procedure B was followed by using diethyl maleate (0.15 mL, 0.94 mmol) as the first olefin and N-dodecyl-maleimide (0.25 g, 0.94 mmol) as the second. The crude product was purified by column chromatography (silica gel;  $\text{CH}_2\text{Cl}_2$ : hexane = 2: 3) to furnish the desired compound (106 mg, 18 %).

IR ( $\text{CH}_2\text{Cl}_2$ , cast)  $\nu$  ( $\text{cm}^{-1}$ ): 2922, 2853, 1754, 1722, 1702, 1260, 1026, 800, 755;  $^1\text{H}$  NMR (400 MHz,  $\text{CDCl}_3$ )  $\delta$  (ppm): 9.15 (d, 1H,  $J = 7.8$  Hz), 8.47 (s, 1H), 8.25 (s, 1H), 8.18 (d, 1H,  $J = 7.8$  Hz), 8.02 (d, 1H,  $J = 8.2$  Hz), 7.96 (d, 1H,  $J = 8.2$  Hz), 7.77 (dd, 1H,  $J = 8.2$  Hz), 7.65 (dd, 1H,  $J = 7.8$  Hz, 7.8 Hz), 4.46-4.40 (m, 4H), 3.77 (t, 2H,  $J = 7.2$  Hz), 1.73-1.68 (m, 2H), 1.44 (t, 3H,  $J = 7.2$  Hz), 1.40-1.22 (m, 21H), 0.84 (t, 3H,  $J = 6.6$  Hz);  $^{13}\text{C}$  NMR (100 MHz,  $\text{CDCl}_3$ )  $\delta$  (ppm): 170.50, 168.33, 167.34, 166.25, 135.13, 133.31, 133.00, 132.87, 131.83, 131.47, 131.39, 131.28, 130.71, 130.55, 130.19, 129.97, 128.71, 128.60, 128.54, 128.46, 127.58, 126.97, 123.35, 122.33, 62.22, 61.89, 38.70, 31.89, 29.61, 29.59, 29.56, 29.50, 29.32, 29.24, 28.50, 26.99, 22.66, 14.25, 14.10, 13.74; UV/Vis ( $\text{CH}_2\text{Cl}_2$ ):  $\lambda_{\text{max}} = 411, 437$  and  $463$  nm, Fluorescence ( $\text{CH}_2\text{Cl}_2$ ,  $\lambda_{\text{ex}} = 463$  nm):  $\lambda_{\text{em}} = 497$  and  $522$  nm,  $\Phi_{\text{F}} = 0.18$ ; HR-FAB-MS. ( $\text{M}^+$ ),  $\text{C}_{40}\text{H}_{43}\text{NO}_6$ , Calc.: 633.3090; Found: 633.3084



**Diethyl 7,8-dicyanoperylene-1,2-dicarboxylate (1f):**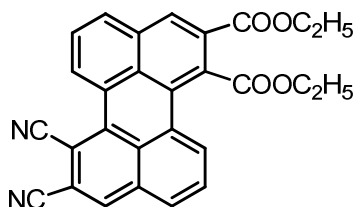

General procedure B was followed by using diethyl maleate (0.15 mL, 0.94 mmol) as the first olefin and fumaronitrile (0.07 g, 0.94 mmol) the second. The crude product was purified by column chromatography (silica gel; CH<sub>2</sub>Cl<sub>2</sub>: hexane = 1: 1) to furnish the desired compound (93 mg, 22 %).

IR (CH<sub>2</sub>Cl<sub>2</sub>, cast)  $\nu$  (cm<sup>-1</sup>): 2969, 2883, 2219, 1723, 1264, 1202, 842, 759; <sup>1</sup>H NMR (500 MHz, CDCl<sub>3</sub>)  $\delta$  (ppm): 9.17 (d, 1H, *J* = 7.5 Hz), 8.53 (s, 1H), 8.28 (d, 1H, *J* = 7.5 Hz), 8.24 (s, 1H), 8.09 (d, 1H, *J* = 8.0 Hz), 7.90 (d, 1H, *J* = 8.0 Hz), 7.82 (dd, 1H, *J* = 7.5 Hz, 7.5 Hz), 7.75 (dd, 1H, *J* = 8.0 Hz, 8.0 Hz), 4.44 (q, 4H, *J* = 7.3 Hz), 1.45 (t, 3H, *J* = 7.3 Hz), 1.31 (t, 3H, *J* = 7.3 Hz); <sup>13</sup>C NMR (125 MHz, CDCl<sub>3</sub>)  $\delta$  (ppm): 170.09, 165.80, 137.29, 134.34, 134.32, 133.34, 132.26, 132.23, 131.94, 130.93, 130.36, 130.25, 130.08, 129.68, 129.59, 129.16, 128.77, 128.25, 127.42, 127.19, 118.03, 116.13, 114.11, 104.65, 62.43, 62.09, 14.25, 13.72; UV/Vis (CH<sub>2</sub>Cl<sub>2</sub>):  $\lambda_{\text{max}}$  = 401, 427 and 451 nm, Fluorescence (CH<sub>2</sub>Cl<sub>2</sub>,  $\lambda_{\text{ex}}$  = 451 nm):  $\lambda_{\text{em}}$  = 504 nm,  $\Phi_F$  = 0.35; HR-FAB-MS. (M<sup>+</sup>), C<sub>28</sub>H<sub>18</sub>N<sub>2</sub>O<sub>4</sub>, Calc.: 446.1267; Found: 446.1260

**Didecyl 2,8-dicyanoperylene-1,7-dicarboxylate (1g):**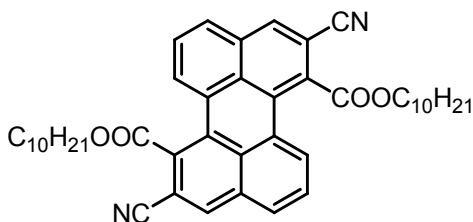

General procedure A was followed by using (E)-decyl 3-cyanoacrylate (0.55 g, 2.35 mmol) and anthraquinone-1,5-dicarbaldehyde (0.25 g, 0.94 mmol) as the substrate. The crude product was purified by flash column chromatography (silica gel; CH<sub>2</sub>Cl<sub>2</sub>: hexane = 4: 1) to furnish the

desired compound (330 mg, 52 %).

IR (CH<sub>2</sub>Cl<sub>2</sub>, cast)  $\nu$  (cm<sup>-1</sup>): 2925, 2229, 1723, 1464, 1268, 1165, 1127, 800; <sup>1</sup>H NMR (500 MHz, CDCl<sub>3</sub>)  $\delta$  (ppm): 8.26 (s, 2H), 8.06 (d, 2H,  $J$  = 7.5 Hz), 7.93 (d, 2H,  $J$  = 7.5 Hz), 7.69 (dd, 2H,  $J$  = 7.5 Hz, 7.5 Hz), 4.40 (t, 4H,  $J$  = 6.9 Hz), 1.69-1.67 (m, 4H), 1.26-1.20 (m, 28H), 0.85 (t, 6H,  $J$  = 6.9 Hz); <sup>13</sup>C NMR (125 MHz, CDCl<sub>3</sub>)  $\delta$  (ppm): 168.42, 134.44, 132.21, 130.17, 129.79, 129.71, 129.52, 129.42, 128.79, 128.51, 116.67, 110.48, 67.29, 31.82, 29.42, 29.23, 29.12, 28.05, 25.87, 22.62, 14.05; UV/Vis (CH<sub>2</sub>Cl<sub>2</sub>):  $\lambda_{\text{max}}$  = 413, 433 nm, Fluorescence (CH<sub>2</sub>Cl<sub>2</sub>,  $\lambda_{\text{ex}}$  = 433 nm):  $\lambda_{\text{em}}$  = 486 nm,  $\Phi_F$  = 0.17; HR-FAB-MS. (M<sup>+</sup>), C<sub>44</sub>H<sub>50</sub>N<sub>2</sub>O<sub>4</sub>, Calc.: 670.3771; Found: 670.3744

### Ethyl 3-cyano-2-(triphenylphosphoranylidene)propanoate:

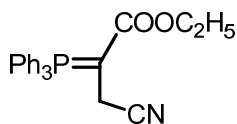

To a solution of ethyl 2-(triphenylphosphoranylidene)acetate (1.20 g, 3.44 mmol) dissolved in ethyl acetate (20.0 mL) was added, under nitrogen, potassium carbonate (0.94 g, 6.88 mmol) followed by bromoacetonitrile (0.36 mL, 5.16 mmol). The solution was refluxed for 4 h. After being cooled back to room temperature, the reaction was quenched with water (20 mL). The water layer was washed twice with ethyl acetate (50 mL). The combined organic phase was dried over MgSO<sub>4</sub> and concentrated. The crude product was purified by column chromatography (silica gel; EtOAc: hexane = 1: 4). The mixture thus obtained (670 mg, 50 %) is used in the next step without further purification.

### Diethyl 1,7-dicyanoperylene-2,8-dicarboxylate (1h):

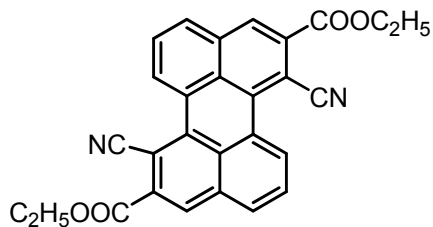

3-cyano-2-(triphenyl- $\lambda^2$ -phosphanylidene)-propionic acid ethyl ester (0.91 g, 2.35 mmol) was dissolved in dry dichloromethane (10.0 mL) and the solution was cooled to 0 °C. Anthraquinone 1,5-dicarbaldehyde (0.25 g, 0.94 mmol) in dry dichloromethane (10.0 mL) was slowly added during 10 minutes. The reaction mixture was allowed to warm to room temperature and stirred for 2 h. The reaction mixture was cooled again to 0 °C and DBU (0.35 mL, 2.35 mmol) was slowly added. The reaction was then warmed back to room temperature and stirred for another 2 h before quenched with cold water. The organic layer was separated and aqueous layer was further extracted with dichloromethane (3 x 50 mL). The combined organic extracts was dried over MgSO<sub>4</sub> and concentrated. The crude product was purified by column chromatography (silica gel; CH<sub>2</sub>Cl<sub>2</sub>) to furnish the desired compound (97 mg, 23 %).

IR (CH<sub>2</sub>Cl<sub>2</sub>, cast)  $\nu$  (cm<sup>-1</sup>): 2923, 2852, 2219, 1731, 1371, 1282, 801, 702; <sup>1</sup>H NMR (500 MHz, CDCl<sub>3</sub>)  $\delta$  (ppm): 9.26 (d, 2H, *J* = 7.8 Hz), 8.54 (s, 2H), 8.06 (d, 2H, *J* = 7.8 Hz), 7.88 (dd, 2H, *J* = 7.8 Hz, 7.8 Hz), 4.57-4.53 (q, 4H, *J* = 7.3 Hz), 1.50 (t, 6H, *J* = 7.3 Hz); <sup>13</sup>C NMR (125 MHz, CDCl<sub>3</sub>)  $\delta$  (ppm): 164.75, 136.68, 133.14, 131.84, 131.52, 131.21, 130.59, 130.02, 129.76, 128.07, 118.91, 104.40, 62.55, 14.19; UV/Vis (CH<sub>2</sub>Cl<sub>2</sub>):  $\lambda_{\text{max}}$  = 409, 432 and 459 nm, Fluorescence (CH<sub>2</sub>Cl<sub>2</sub>,  $\lambda_{\text{ex}}$  = 459 nm):  $\lambda_{\text{em}}$  = 480, 505 nm,  $\Phi_F$  = 0.67; HR-EI-MS. (*M*<sup>+</sup>), C<sub>28</sub>H<sub>18</sub>N<sub>2</sub>O<sub>4</sub>, Calc.: 446.1267; Found: 446.1269

### 1,5-Dialkenyl anthraquinone (6):

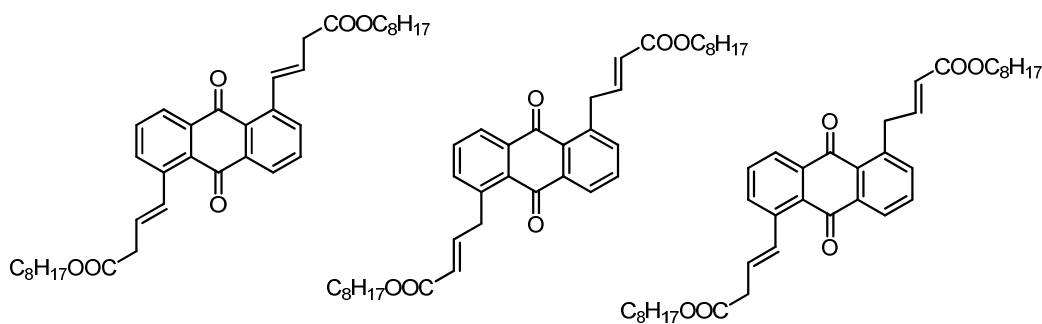

A mixture of 1,5-diiodo-anthraquinone (1.00 g, 2.17 mmol), octyl 3-butenate (2.14 g, 10.85 mmol), (MeCN)<sub>2</sub>PdCl<sub>2</sub> (0.11 g, 0.43 mmol), tetrabutylammonium bromide (1.74 g, 5.42 mmol) and triethylamine (2.0 mL) in dry toluene (20.0 mL) was heated at 100 °C for 24 h under nitrogen. The solvent was removed under reduced pressure. The crude product was purified by

flash chromatography (silica gel; CH<sub>2</sub>Cl<sub>2</sub>: hexane = 8: 2) to give yellowish mixture of alkene regioisomers (770 mg, 59 %).

IR (CH<sub>2</sub>Cl<sub>2</sub>, cast)  $\nu$  (cm<sup>-1</sup>): 2926, 2855, 1731, 1668, 1319, 1269, 1162, 1024, 712; <sup>1</sup>H NMR (500 MHz, CDCl<sub>3</sub>)  $\delta$  (ppm): 8.22-8.18 (m), 7.81-7.79 (m), 7.69-7.66 (m), 7.61 (d, *J* = 16 Hz), 7.53-7.50 (m), 7.22-7.17 (m), 6.26-6.23 (m), 5.76 (d, *J* = 16.0 Hz), 4.16-4.10 (m), 4.06 (t, *J* = 7.0 Hz), 3.38-3.37 (m), 1.66-1.58 (m), 1.35-1.24 (m), 0.86-0.82 (m); <sup>13</sup>C NMR (125 MHz, CDCl<sub>3</sub>)  $\delta$  (ppm): 185.13, 185.04, 184.82, 184.73, 171.57, 166.54, 146.62, 140.46, 139.75, 137.07, 137.00, 136.58, 135.91, 135.85, 133.87, 133.81, 133.66, 133.46, 133.05, 130.32, 129.05, 127.28, 127.19, 127.14, 127.03, 126.14, 126.09, 122.40, 65.06, 64.52, 38.45, 37.47, 31.76, 29.20, 29.18, 29.13, 28.61, 25.92, 22.61, 14.05; HR-ESI-MS. (M+Na)<sup>+</sup>, C<sub>38</sub>H<sub>48</sub>O<sub>6</sub>Na, Calc.: 623.3349; Found: 623.3339

#### Diethyl perylene-1,7-dicarboxylate (2):

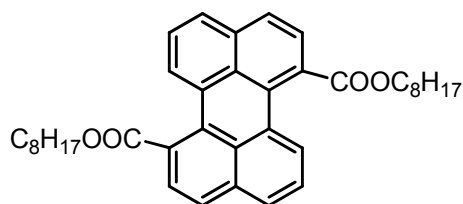

To a solution of diethyl perylene-1,7-dicarboxylate (100 mg, 0.16 mmol) in t-butanol (5.0 mL) was added sodium tert-butoxide (0.038 g, 0.4 mmol) in t-butanol (5.0 mL) at room temperature. The reaction mixture was stirred for 60 minutes before quenched with saturated NH<sub>4</sub>Cl solution. The volatiles were removed in vacuo and the residue was extracted with dichloromethane (3 x 50 mL). The combined organic extracts was dried over MgSO<sub>4</sub> and concentrated. The crude product was purified by flash column chromatography (silica gel; CH<sub>2</sub>Cl<sub>2</sub>: hexane = 1: 1) to give yellow solid product (24 mg, 26 %).

IR (CH<sub>2</sub>Cl<sub>2</sub>, cast)  $\nu$  (cm<sup>-1</sup>): 2925, 2854, 1712, 1463, 1266, 1121, 836, 755; <sup>1</sup>H NMR (500 MHz, CDCl<sub>3</sub>)  $\delta$  (ppm): 7.80 (d, 2H, *J* = 8.5 Hz); 7.79 (d, 2H, *J* = 7.8 Hz); 7.75 (d, 2H, *J* = 7.8 Hz), 7.69 (d, 2H, *J* = 8.5 Hz), 7.53 (dd, 2H, *J* = 7.8 Hz, 7.8 Hz), 4.26 (t, 4H, *J* = 6.9 Hz), 1.58~1.54 (m, 8H); 1.23~1.15 (m, 16H), 0.83 (t, 6H, *J* = 6.9 Hz); <sup>13</sup>C NMR (125 MHz, CDCl<sub>3</sub>)  $\delta$  (ppm): 172.07, 133.99, 129.98, 129.80, 129.40, 128.85, 128.06, 127.76, 127.33, 127.23, 126.95, 66.07, 31.70,

29.17, 29.09, 28.20, 25.98, 22.61, 14.05; UV/Vis (CH<sub>2</sub>Cl<sub>2</sub>):  $\lambda_{\text{max}}$  = 419 and 440 nm, Fluorescence (CH<sub>2</sub>Cl<sub>2</sub>,  $\lambda_{\text{ex}}$  = 440 nm):  $\lambda_{\text{em}}$  = 503 nm,  $\Phi_{\text{F}}$  = 0.24; HR-EI-MS. (M<sup>+</sup>), C<sub>38</sub>H<sub>44</sub>O<sub>4</sub>, Calc.: 564.3240; Found: 564.3246

### 1,5-Bis(decyloxy)anthraquinone:

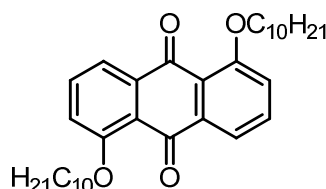

A suspension of 1,5-dihydroxy anthraquinone (5.00 g, 20.83 mmol) and K<sub>2</sub>CO<sub>3</sub> (10.00 g, 72.90 mmol) in anhydrous DMF (100 mL) was heated at 100 °C under N<sub>2</sub>. Then, 1-iododecane (11.1 mL, 52.07 mmol) was added dropwise and the mixture was stirred overnight at 100 °C. After cooled to room temperature, the solvent was evaporated under reduced pressure. The residue was dissolved in dichloromethane (200 mL) and washed with 10 % HCl (100 mL) followed by H<sub>2</sub>O (2 x 100 mL). The organic layer was dried over MgSO<sub>4</sub> and concentrated to give the alkylated compound (7.8 g, 72 %).

IR (CH<sub>2</sub>Cl<sub>2</sub>, cast)  $\nu$  (cm<sup>-1</sup>): 2951, 2921, 2849, 1665, 1584, 1446, 1273, 1260; <sup>1</sup>H NMR (400 MHz, CDCl<sub>3</sub>)  $\delta$  (ppm): 7.86 (dd, 2H,  $J$  = 0.8 Hz, 8.1 Hz), 7.63 (dd, 2H,  $J$  = 8.1 Hz, 8.1 Hz), 7.22 (dd, 2H,  $J$  = 0.8 Hz, 8.1 Hz), 4.12 (t, 4H,  $J$  = 6.5 Hz), 1.96-1.89 (m, 4H), 1.57-1.50 (m, 4H), 1.39-1.30 (m, 24H), 0.85 (t, 6H,  $J$  = 7.0 Hz); <sup>13</sup>C NMR (100 MHz, CDCl<sub>3</sub>)  $\delta$  (ppm): 182.56, 159.36, 137.50, 134.77, 121.07, 119.48, 117.77, 69.64, 31.90, 29.54, 29.33, 29.32, 29.10, 25.91, 22.67, 14.10; HR-EI-MS. (M<sup>+</sup>), C<sub>34</sub>H<sub>48</sub>O<sub>4</sub>, Calc.: 520.3553; Found: 520.3546

### 1,5-Bis(decyloxy)-anthracene:

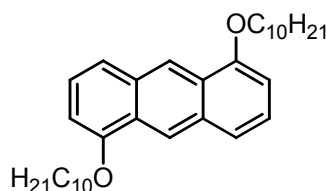

1,5-bis(decyloxy)anthraquinone (1.00 g, 1.92 mmol) was dissolved in n-BuOH (20.0 mL). NaBH<sub>4</sub> (1.42 g, 38.4 mmol) was added to the reaction mixture and stirred at 100 °C for 12 h under nitrogen. The reaction was cooled before excess hydride was decomposed by 1N HCl (50.0 mL, added slowly). The volatiles were removed in vacuo and the residue was extracted with dichloromethane (3 x 100 mL). Combined organic extracts was washed with water (2 x 100 mL) followed by brine (50 mL). The organic layer was dried over MgSO<sub>4</sub> and evaporated in vacuo. The crude product was purified by column chromatography (silica gel; CH<sub>2</sub>Cl<sub>2</sub>: hexane = 1: 4) to give the desired compound (620 mg, 64 %).

IR (CH<sub>2</sub>Cl<sub>2</sub>, cast)  $\nu$  (cm<sup>-1</sup>): 2918, 2847, 1632, 1541, 1458, 1257, 1175, 1112; <sup>1</sup>H NMR (500 MHz, CDCl<sub>3</sub>)  $\delta$  (ppm): 8.76 (s, 2H), 7.59 (d, 2H, *J* = 8 Hz), 7.31 (dd, 2H, *J* = 8 Hz, 8 Hz), 6.70 (d, 2H, *J* = 8 Hz), 4.18 (t, 4H, *J* = 6.5 Hz), 2.00-1.96 (m, 4H), 1.61-1.56 (m, 4H), 1.44-1.27 (m, 24H), 0.86 (t, 6H, *J* = 6.8 Hz); <sup>13</sup>C NMR (125 MHz, CDCl<sub>3</sub>)  $\delta$  (ppm): 154.81, 132.20, 125.46, 124.98, 120.83, 120.46, 102.59, 68.22, 31.92, 29.63, 29.60, 29.48, 29.35, 29.32, 26.34, 22.69, 14.10; HR-EI-MS. (M<sup>+</sup>), C<sub>34</sub>H<sub>50</sub>O<sub>2</sub>, Calc.: 490.3811; Found: 490.3803

#### 4,8-Bis(decyloxy)- 1,5-dicarbaldehyde anthracene (7):

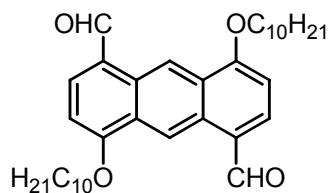

To distilled POCl<sub>3</sub> (0.28 mL, 3.05 mmol) at 0 °C, N-methy formanilide (0.45 mL, 3.66 mmol) was added and stirred for 10 minutes. The Vilsmeier reagent formed was added to a solution of 1,5-bis(decyloxy)anthracene (0.60 g, 1.22 mmol) in o-dichlorobenzene (10.0 mL) slowly at 0 °C. The reaction mixture was heated at 100 °C for 2 h under nitrogen. The reaction mixture was then cooled in an ice-salt bath and neutralized with sodium acetate solution. Diluted with more water, the reaction mixture was allowed to stand at 0 °C for 2 h. Dichloromethane (50 mL) was added to the reaction mixture and separated the organic layer. Aqueous phase was again extracted with dichloromethane (2 x 100 mL). The combined organic extracts was dried over MgSO<sub>4</sub> and evaporated in vacuo. The crude product was purified by column chromatography (silica gel;

CH<sub>2</sub>Cl<sub>2</sub>: hexane = 1: 1) to furnish the dialdehyde product (480 mg, 73 %).

IR (CH<sub>2</sub>Cl<sub>2</sub>, cast)  $\nu$  (cm<sup>-1</sup>): 2918, 2851, 2731, 1674, 1543, 1198, 1113, 1071; <sup>1</sup>H NMR (500 MHz, CDCl<sub>3</sub>)  $\delta$  (ppm): 10.36 (s, 2H), 10.25 (s, 2H), 7.95 (d, 2H, *J* = 7.8 Hz), 6.89 (d, 2H, *J* = 7.8 Hz), 4.31 (t, 4H, *J* = 6.5 Hz), 2.09-2.04 (m, 4H), 1.67-1.63 (m, 4H), 1.47-1.29 (m, 24H), 0.84 (t, 6H, *J* = 6.8 Hz); <sup>13</sup>C NMR (125 MHz, CDCl<sub>3</sub>)  $\delta$  (ppm): 191.84, 161.00, 141.39, 128.73, 126.55, 125.13, 119.76, 102.65, 69.05, 31.89, 29.61, 29.58, 29.37, 29.31, 28.95, 26.07, 22.67, 14.10; HR-EI-MS. (M<sup>+</sup>), C<sub>36</sub>H<sub>50</sub>O<sub>4</sub>, Calc.: 546.3709; Found: 546.3703

**2,2'-(anthracene-4,8-didecyloxyl -1,5-diylbis(methan-1-yl-1-ylidene))disuccinonitrile (8):**

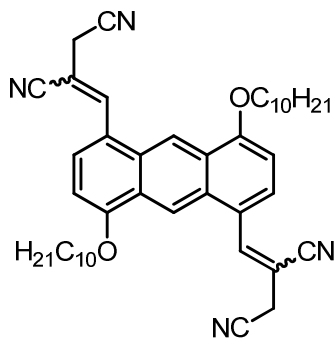

Fumaronitrile (0.18 g, 2.35 mmol) was dissolved in dry dichloromethane (2.0 mL) and the solution was cooled to 0 °C. Triethyl phosphine (1.0 M in THF, 2.5 mL, 2.5 mmol) was slowly added at this temperature. The reaction mixture was stirred at the same temperature for 10 min. To this solution, 4,8-bis(decyloxy)-anthracene-1,5-dicarbaldehyde (0.25 g, 0.94 mmol) in dry dichloromethane (10.0 mL) was slowly added. The reaction mixture was refluxed for 12 h. The reaction mixture was brought to room temperature before poured into cold water. The organic layer was separated and aqueous layer was extracted with dichloromethane (3 x 50 mL). The combined organic phases were dried over MgSO<sub>4</sub>. After concentrated in vacuum, the residue was purified by column chromatography (silica gel; CH<sub>2</sub>Cl<sub>2</sub>: hexane = 1: 1) to furnish the desired compound (167 mg, 55 %). At least three E/Z isomers can be distinguished in <sup>1</sup>H NMR spectrum. This mixture was taken in the subsequent transformation without further purification. IR (CH<sub>2</sub>Cl<sub>2</sub>, cast)  $\nu$  (cm<sup>-1</sup>): 2924, 2854, 2212, 1655, 1611, 1546, 1416, 1322, 1259, 1194, 1109, 1054, 879, 822, 746, 537; <sup>1</sup>H NMR (500 MHz, CDCl<sub>3</sub>)  $\delta$  (ppm): 8.90 (s), 8.73 (s), 8.19 (s); 8.14-8.05 (m), 7.40-7.38 (m), 6.88-6.83 (m), 4.31-4.25 (m), 3.65 (s), 3.51 (s), 2.75 (s), 2.05-2.00 (m),

1.59-1.56 (m), 1.49-1.43 (m), 1.36-1.25 (m), 0.85 (t,  $J = 6.0$  Hz);  $^{13}\text{C}$  NMR (125 MHz,  $\text{CDCl}_3$ )  $\delta$  (ppm): 157.45, 157.37, 157.24, 157.16, 147.35, 147.25, 144.49, 144.42, 129.86, 129.63, 129.57, 129.35, 129.00, 128.95, 128.80, 128.69, 125.42, 125.33, 125.25, 125.16, 121.70, 121.39, 118.16, 118.10, 118.04, 117.20, 117.12, 117.04, 115.21, 115.12, 114.73, 114.68, 104.34, 104.13, 103.04, 102.83, 102.61, 100.59, 100.32, 69.03, 68.96, 68.90, 68.82, 31.88, 29.65, 29.60, 29.56, 29.32, 28.95, 28.89, 26.22, 23.77, 22.65, 19.91, 14.08; HR-EI-MS. ( $\text{M}^+$ ),  $\text{C}_{44}\text{H}_{54}\text{N}_4\text{O}_2$ , Calc.: 670.4247; Found: 670.4247

**2,2'-(anthraquinone-4,8-didecyloxyl -1,5-diylbis(methan-1-yl-1-ylidene))disuccinonitrile (9):**

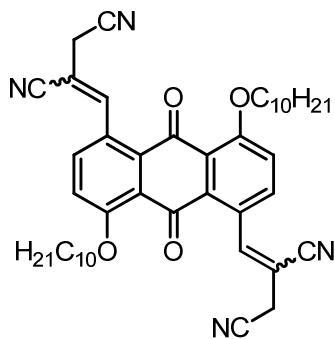

The mixed Wittig product from last step, (600 mg, 0.895 mmol) was suspended in a mixed solvent (40.0 mL HOAc, 4.0 mL  $\text{H}_2\text{O}$ , and 20.0 mL acetone). To this suspension was added a solution of  $\text{CrO}_3$  (0.89 g, 8.95 mmol) in HOAc (20.0 mL) and  $\text{H}_2\text{O}$  (8.0 mL) at room temperature. The mixture was stirred for 24 h before quenched with isopropyl alcohol (5.0 mL). Stirring was continued for further 30 min. The volatiles were removed in vacuo and the residue was extracted with dichloromethane (3 x 100 mL). The combined organic phases was dried over  $\text{MgSO}_4$  and concentrated to furnish the desired compound (330 mg, 53 %). At least three diastereomers can be distinguished in  $^1\text{H}$  NMR spectrum. This compound was used in the next step without further purification.

IR ( $\text{CH}_2\text{Cl}_2$ , cast)  $\nu$  ( $\text{cm}^{-1}$ ): 2924, 2854, 2253, 2216, 1663, 1582, 1553, 1426;  $^1\text{H}$  NMR (500 MHz,  $\text{CDCl}_3$ )  $\delta$  (ppm): 7.99-7.85 (m), 7.48-7.45 (m), 7.33-7.29 (m), 4.19-4.16 (m), 3.56 (s), 3.25 (s), 1.95-1.90 (m), 1.70-1.36 (m), 0.85 (t,  $J = 6.8$  Hz); HR-FAB-MS. ( $\text{M}+\text{H}^+$ ),  $\text{C}_{44}\text{H}_{53}\text{N}_4\text{O}_4$ , Calc.: 701.4067; Found: 701.4069



**6,12-Bis(decyloxy)perylene-1,2,7,8-tetracarbonitrile (3a):**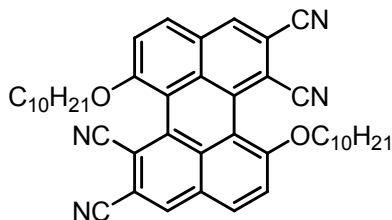

The anthraquinone derivative from last step (300 mg, 0.42 mmol) was dissolved in dry dichloromethane (10.0 mL) and the solution was cooled to 0 °C. To this chilled solution, DBU (640 mg, 4.20 mmol, 10 equivalents) was added. The reaction was then warmed to room temperature and stirred for 2 h before being added with cold water. The organic layer was separated and aqueous layer was further extracted with dichloromethane (3 x 50 mL). The combined organic extracts was dried over MgSO<sub>4</sub> and concentrated. The crude product was purified by column chromatography (silica gel; CH<sub>2</sub>Cl<sub>2</sub>: hexane = 1: 1) to furnish the desired compound as red colored power (0.13 g, 46 %).

IR (CH<sub>2</sub>Cl<sub>2</sub>, cast)  $\nu$  (cm<sup>-1</sup>): 2924, 2854, 2226, 1587, 1486, 1464, 1268, 1113; <sup>1</sup>H NMR (500 MHz, CDCl<sub>3</sub>)  $\delta$  (ppm): 8.16 (s, 2H), 8.00 (d, 2H,  $J$  = 9.0 Hz), 7.61 (d, 2H,  $J$  = 9.0 Hz); 4.41-4.01 (br, 4H), 2.10-1.95 (m, 4H), 1.42-1.21 (m, 28H), 0.85 (t, 6H,  $J$  = 6.8 Hz); <sup>13</sup>C NMR (125 MHz, CDCl<sub>3</sub>)  $\delta$  (ppm): 159.07, 133.04, 132.95, 132.29, 132.01, 126.75, 117.15, 116.36, 116.26, 113.58, 110.57, 109.31, 69.25, 31.87, 29.49, 29.47, 29.26, 29.24, 28.70, 25.89, 22.65, 14.10; UV/Vis (CH<sub>2</sub>Cl<sub>2</sub>):  $\lambda_{\text{max}}$  = 489 and 516 nm, Fluorescence (CH<sub>2</sub>Cl<sub>2</sub>,  $\lambda_{\text{ex}}$  = 489 nm):  $\lambda_{\text{em}}$  = 552 and 592 nm,  $\Phi_{\text{F}}$  = 0.83; HR-EI-MS. (M<sup>+</sup>), C<sub>44</sub>H<sub>48</sub>N<sub>4</sub>O<sub>2</sub>, Calc.: 664.3777; Found: 664.3783

**2,6-Bis(decyloxy)anthracquinone:**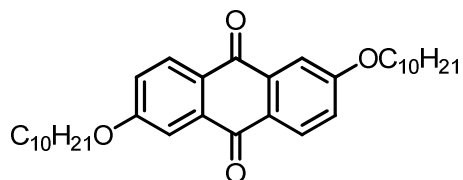

A suspension of 2,6-dihydroxy anthraquinone (5.00 g, 20.83 mmol) and  $K_2CO_3$  (10.00 g, 72.90 mmol) in anhydrous DMF (100 mL) was heated at 100 °C under  $N_2$ . Then, 1-iododecane (11.1 mL, 52.07 mmol) was slowly added and the mixture was stirred overnight at 100 °C. After cooled to room temperature, the mixture was concentrated under reduced pressure. The residue was dissolved in dichloromethane (200 mL) and washed with 10 % HCl (100 mL) followed by  $H_2O$  (2 x 100 mL). The organic layer was dried over  $MgSO_4$  and concentrated to give the desired compound (7.8 g, 72 %).

IR ( $CH_2Cl_2$ , cast)  $\nu$  ( $cm^{-1}$ ): 2920, 2851, 1664, 1587, 1331, 1318, 884, 746;  $^1H$  NMR (500 MHz,  $CDCl_3$ )  $\delta$  (ppm): 8.20 (d, 2H,  $J = 9.0$  Hz), 7.68 (d, 2H,  $J = 2.5$  Hz), 7.19 (dd, 2H,  $J = 2.5$  Hz, 9.0 Hz), 4.12 (t, 4H,  $J = 6.5$  Hz), 1.85-1.79 (m, 4H), 1.49-1.43 (m, 4H), 1.35-1.26 (m, 24 H), 0.86 (t, 6H,  $J = 7.0$  Hz);  $^{13}C$  NMR (125 MHz,  $CDCl_3$ )  $\delta$  (ppm): 182.30, 164.07, 135.87, 129.64, 127.00, 120.89, 110.57, 68.83, 31.89, 29.54, 29.32, 29.31, 29.03, 25.95, 22.67, 14.09; HR-FAB-MS.  $(M+H)^+$ ,  $C_{34}H_{49}O_4$ , Calc.: 521.3631; Found: 521.3629

### 2,6-Bis(decyloxy)anthracene:

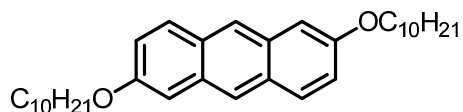

$NaBH_4$  (1.42 g, 38.4 mmol) was added to a suspension of 2,6-bis(decyloxy)anthraquinone (1.00 g, 1.92 mmol) in  $n$ -BuOH (20.0 mL). The reaction was stirred at 100 °C for 12 h under nitrogen. After the reaction mixture was cooled to room temperature, the excess hydride was decomposed by 1N HCl (50 mL). The volatiles were removed in vacuo and the residue was extracted with dichloromethane (3 x 100 mL). Combined organic extracts were washed with water (2 x 100 mL) and brine (50 mL). The organic layer was dried over  $MgSO_4$  and evaporated in vacuo. The crude product was purified by column chromatography (silica gel;  $CH_2Cl_2$ : hexane = 1: 4) to give the desired compound (620 mg, 64 %).

IR ( $CH_2Cl_2$ , cast)  $\nu$  ( $cm^{-1}$ ): 2918, 2850, 1612, 1464, 1207, 1019, 886, 803;  $^1H$  NMR (500 MHz,  $CDCl_3$ )  $\delta$  (ppm): 8.15 (s, 2H), 7.81 (d, 2H,  $J = 9.0$  Hz), 7.13 (s, 2H), 7.12 (d, 2H,  $J = 9.0$  Hz), 4.08 (t, 4H,  $J = 6.8$  Hz), 1.88-1.82 (m, 4H), 1.53-1.47 (m, 4H), 1.39-1.27 (m, 24H), 0.87 (t, 6H,  $J = 7.0$  Hz);  $^{13}C$  NMR (125 MHz,  $CDCl_3$ )  $\delta$  (ppm): 155.91, 131.20, 129.05, 128.63, 124.05,

120.71, 104.57, 67.92, 31.85, 29.55, 29.52, 29.39, 29.27, 29.21, 26.11, 22.62, 14.04; HR-EI-MS. ( $M^+$ ),  $C_{34}H_{50}O_2$ , Calc.: 490.3811; Found: 490.3809

**2,6-Bis(decyloxy)anthracene-1,5-dicarbaldehyde (10):**

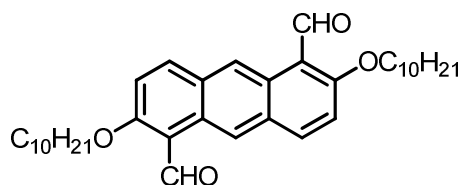

2,6-bis(decyloxy)-anthracene (0.60 g, 1.22 mmol) was dissolved in o-dichlorobenzene (10.0 mL). N-methy formanilide (0.45 mL, 3.66 mmol) and distilled  $POCl_3$  (0.28 mL, 3.05 mmol) were added. The reaction mixture was heated to 80 °C for 50 minutes. The reaction mixture was then cooled in an ice-salt bath and neutralized with sodium acetate solution. After diluted with water, the reaction mixture was allowed to stand at 0 °C for another 2 h. Dichloromethane (50 mL) was added to the reaction mixture and the organic layer was separated. Aqueous phase was extracted with dichloromethane (2 x 100 mL). The combined organic extracts was dried over  $MgSO_4$  and evaporated in vacuo. The crude product was purified by column chromatography (silica gel;  $CH_2Cl_2$ : hexane = 2: 3) to furnish the dialdehyde product (300 mg, 45 %) along with the by-product 2,6-bis(decyloxy)anthracene-9-carbaldehyde (222 mg, 35 %).

IR ( $CH_2Cl_2$ , cast)  $\nu$  ( $cm^{-1}$ ): 2919, 2849, 1656, 1461, 1155, 1085, 887, 805;  $^1H$  NMR (500 MHz,  $CDCl_3$ )  $\delta$  (ppm): 10.94 (s, 2H), 9.86 (s, 2H), 8.29 (d, 2H,  $J = 9.5$  Hz), 7.36 (d, 2H,  $J = 9.5$  Hz), 4.27 (t, 4H,  $J = 6.3$  Hz), 1.92-1.86 (m, 4H), 1.51-1.48 (m, 4H), 1.37-1.26 (m, 24 H), 0.86 (t, 6H,  $J = 7.0$  Hz);  $^{13}C$  NMR (125 MHz,  $CDCl_3$ )  $\delta$  (ppm): 191.70, 164.66, 139.51, 129.97, 127.54, 125.05, 115.42, 69.89, 31.87, 29.69, 29.54, 29.40, 29.33, 29.29, 26.05, 22.66, 14.08; HR-MALDI-MS. ( $M+H$ ) $^+$ ,  $C_{36}H_{51}O_4$ , Calc.: 547.3787; Found: 547.3808

**(2Z,2'Z)-Tetraethyl2,2'-((2,6-bis(decyloxy)anthracene-1,5-diyl)bis(methanylylidene))disuccinate (11):**

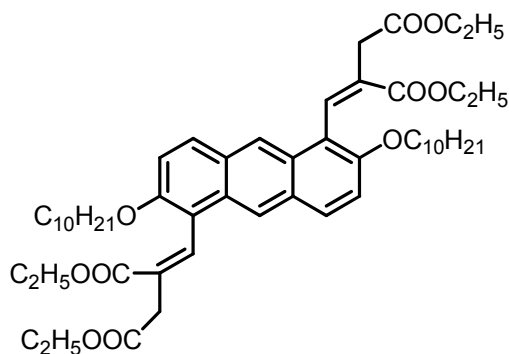

Bis(2,2,2-trifluoroethyl)phosphite (0.53 g, 2.16 mmol) was added slowly to a stirred suspension of sodium hydride [NaH (60 %), 0.086 g, 2.16 mmol] in THF (20.0 mL) at 20 °C under nitrogen. The reaction mixture was stirred for 0.5 h at 20 °C and diethyl maleate (0.37 g, 2.16 mmol) was slowly added. The mixture was further stirred for 0.5 h and the 2,6-bis(decyloxy)anthracene-1,5-dicarbaldehyde (0.30 g, 0.54 mmol in 30.0 mL THF) was added. After the addition, the mixture was refluxed for 24 h before the reaction was quenched with HCl (2.0 M, 30 mL). The reaction mixture was extracted with dichloromethane (3 x 50 mL). The combined organic layer was washed with brine (20 mL) and dried over anhydrous MgSO<sub>4</sub>. After the volatiles were removed in vacuo, the residue was purified by column chromatography (silica gel; CH<sub>2</sub>Cl<sub>2</sub>: hexane = 1: 1) to furnish the Wittig-Horner product (0.29 g, 62 %).

IR (CH<sub>2</sub>Cl<sub>2</sub>, cast)  $\nu$  (cm<sup>-1</sup>): 2926, 2857, 1735, 1714, 1610, 1462, 1260, 1178, 1090; <sup>1</sup>H NMR (500 MHz, CDCl<sub>3</sub>)  $\delta$  (ppm): 8.28 (s, 2H), 8.09 (s, 2H), 7.95 (d, 2H, *J* = 9.5 Hz), 7.29 (d, 2H, *J* = 9.5 Hz), 4.35 (q, 4H, *J* = 7.0 Hz), 4.09 (t, 4H, *J* = 7.0 Hz), 3.98 (q, 4H, *J* = 7.0 Hz), 3.23 (s, 4H), 1.77-1.72 (m, 4H), 1.42-1.22 (m, 34H), 1.08 (t, 6H, *J* = 7.0 Hz), 0.85 (t, 6H, *J* = 7.0 Hz); <sup>13</sup>C NMR (125 MHz, CDCl<sub>3</sub>)  $\delta$  (ppm): 171.07, 167.14, 152.66, 136.70, 130.91, 130.02, 128.99, 128.58, 123.29, 116.67, 116.52, 69.98, 60.97, 60.42, 34.87, 31.87, 29.59, 29.55, 29.35, 29.30, 25.95, 22.66, 14.28, 14.06, 14.03; HR-FAB-MS. (M<sup>+</sup>), C<sub>52</sub>H<sub>74</sub>O<sub>10</sub>, Calc.: 858.5282; Found: 858.5278

**(2Z,2'Z)-Tetraethyl-2,2'-((2,6-bis(decyloxy)-anthraquinone-1,5-diyl)bis(methanylylidene))disuccinate (12):**

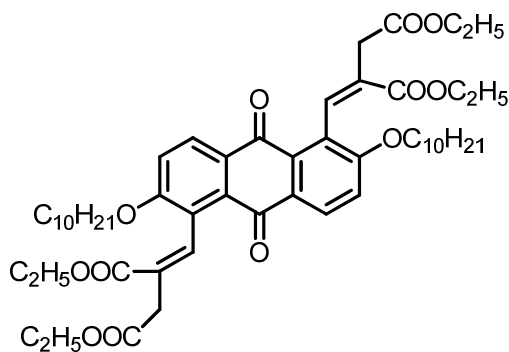

To a suspension of the Wittig-Horner product from last step, (300 mg, 0.34 mmol in 20.0 mL HOAc, 2.0 mL H<sub>2</sub>O, and 10.0 mL acetone) was added a solution of CrO<sub>3</sub> (0.34 g, 3.40 mmol in 10.0 mL HOAc and 4.0 mL H<sub>2</sub>O) at room temperature. The mixture was stirred for 6 h before quenched with isopropyl alcohol (2.5 mL). Stirring was continued for further 30 min. The volatiles were removed in vacuo and the residue was extracted with dichloromethane (3 x 100 mL). The combined organic phases was dried over MgSO<sub>4</sub> and concentrated to furnish the desired compound (250 mg, 81 %).

IR (CH<sub>2</sub>Cl<sub>2</sub>, cast)  $\nu$  (cm<sup>-1</sup>): 2926, 2853, 1740, 1666, 1567, 1275, 1032, 847, 744; <sup>1</sup>H NMR (500 MHz, acetone-d<sub>6</sub>)  $\delta$  (ppm): 8.24 (d, 2H, *J* = 9.0 Hz), 8.01 (s, 2H), 7.56 (d, 2H, *J* = 9.0 Hz), 4.29 (q, 4H, *J* = 7.0 Hz), 4.21 (t, 4H, *J* = 6.5 Hz), 3.90 (q, 4H, *J* = 7.0 Hz), 3.07 (s, 4H), 1.83-1.78 (m, 4H), 1.48-1.28 (m, 34H), 1.05 (t, 6H, *J* = 7.0 Hz), 0.87 (t, 6H, *J* = 6.8 Hz); <sup>13</sup>C NMR (125 MHz, CDCl<sub>3</sub>)  $\delta$  (ppm): 182.74, 170.50, 166.93, 160.08, 138.18, 132.18, 130.47, 128.15, 126.51, 124.89, 116.20, 69.36, 60.92, 60.37, 34.33, 31.84, 29.51, 29.49, 29.26, 29.23, 28.76, 25.80, 22.64, 14.27, 14.05, 14.02; HR-EI-MS. (M<sup>+</sup>), C<sub>52</sub>H<sub>72</sub>O<sub>12</sub>, Calc.: 888.5024; Found: 888.5018

**Tetraethyl 4,10-bis(decyloxy)-7,8-bis(propionyloxy)perylene-1,2,7,8-tetracarboxylate (3b):**

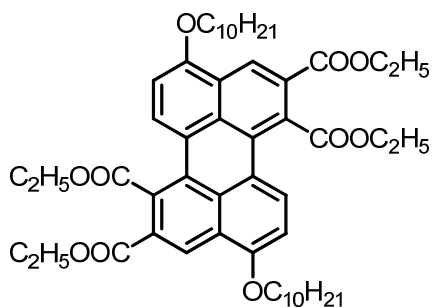

The crude anthraquinone product from last step (250 mg, 0.28 mmol) was dissolved in dry toluene (10.0 mL) and the solution was cooled to 0 °C. To this chilled solution was added DBU (0.42 mL, 2.80 mmol) and the reaction was then refluxed for 12 h. The volatiles were removed in vacuo and the residue was extracted with dichloromethane (3 x 100 mL). The combined organic extracts were dried over MgSO<sub>4</sub> and concentrated. The crude product was purified by column chromatography (silica gel; CH<sub>2</sub>Cl<sub>2</sub>: hexane = 1: 1) to furnish the desired compound as a yellow solid (170 mg, 71 %).

IR (CH<sub>2</sub>Cl<sub>2</sub>, cast)  $\nu$  (cm<sup>-1</sup>): 2927, 2855, 1721, 1584, 1468, 1262, 1129, 1025; <sup>1</sup>H NMR (500 MHz, CDCl<sub>3</sub>)  $\delta$  (ppm): 8.68 (s, 2H), 7.92 (d, 2H, *J* = 8.5 Hz), 6.85 (d, 2H, *J* = 8.5 Hz), 4.43-4.36 (m, 8H), 4.19 (t, 4H, *J* = 6.5 Hz), 1.99-1.93 (m, 4H), 1.59-1.53 (m, 4H), 1.42-1.23 (m, 36H), 0.86 (t, 6H, *J* = 6.8 Hz); <sup>13</sup>C NMR (125 MHz, CDCl<sub>3</sub>)  $\delta$  (ppm): 171.03, 166.81, 155.63, 131.89, 129.08, 129.03, 128.01, 127.74, 124.13, 123.84, 121.91, 106.67, 68.78, 61.79, 61.53, 31.89, 29.64, 29.58, 29.45, 29.33, 29.11, 26.18, 22.67, 14.23, 14.09, 13.84; UV/Vis (CH<sub>2</sub>Cl<sub>2</sub>):  $\lambda_{\text{max}}$  = 435 and 459 nm, Fluorescence (CH<sub>2</sub>Cl<sub>2</sub>,  $\lambda_{\text{ex}}$  = 489 nm):  $\lambda_{\text{em}}$  = 550 nm,  $\Phi_{\text{F}}$  = 0.54; HR-FAB-MS. (M<sup>+</sup>), C<sub>52</sub>H<sub>68</sub>O<sub>10</sub>, Calc.: 852.4812; Found: 852.4820

### 3. UV/Vis Absorption and Fluorescence Spectra:

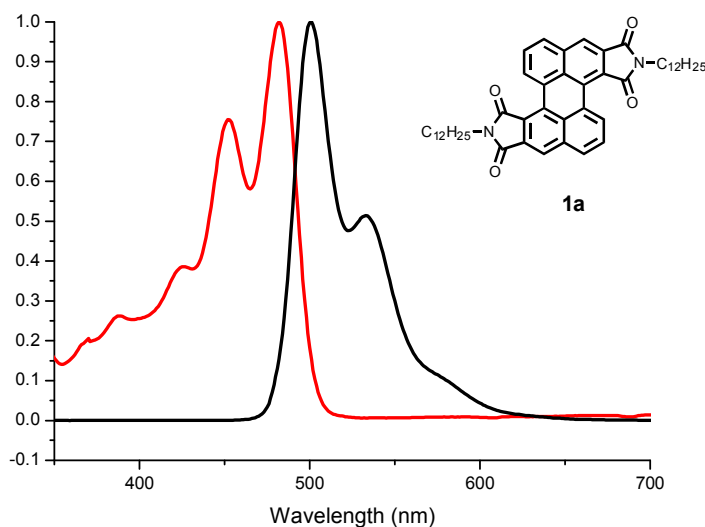

UV and PL spectrum of perylene-1,2,7,8-bis(1'-dodecyl-1H-pyrrole-2,5'-dione) (**1a**)

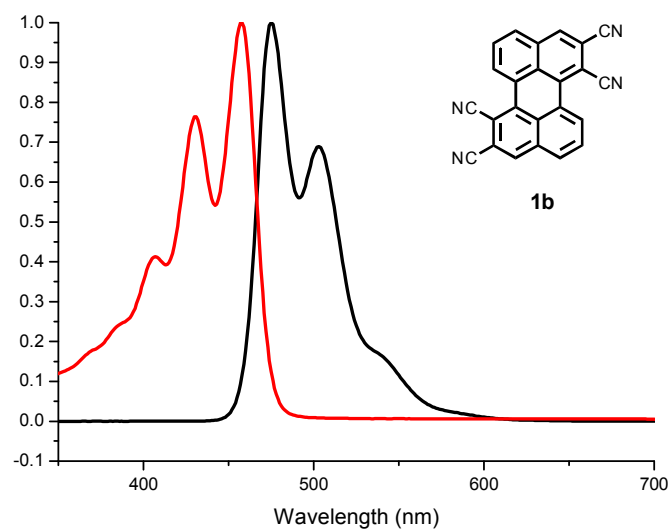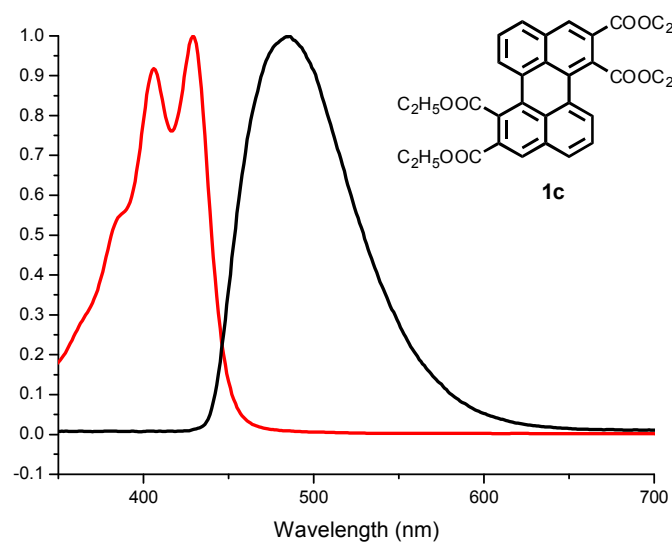

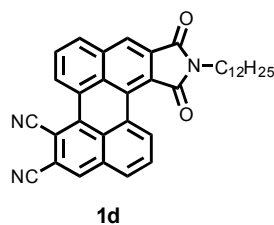

UV and PL spectrum of perylene-7,8-dicarbonitrile1,2-(1'-dodecyl-1H-pyrrole-2',5-dione) (**1d**)

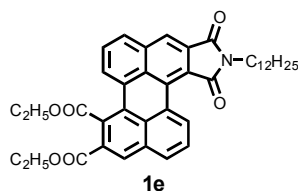

UV and PL spectrum of diethyl 7,8-(1'-dodecyl-1H-pyrrole-2',5'-dione)-1,2-dicarboxylate (**1e**)



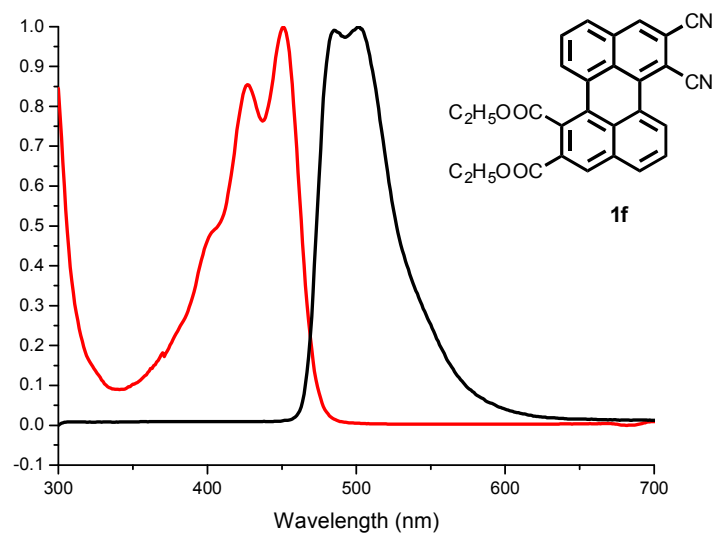

UV and PL spectrum of diethyl 7,8-dicyanoperylene-1,2-dicarboxylate (**1f**)

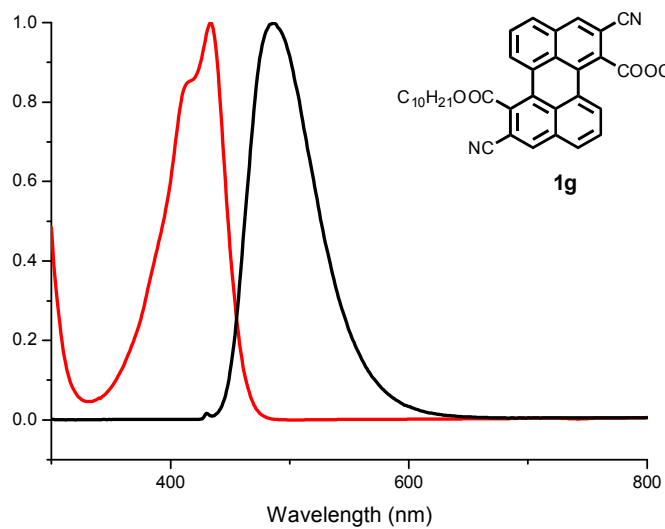

UV and PL spectrum of didecyl 2,8-dicyanoperylene-1,7-dicarboxylate (**1g**)

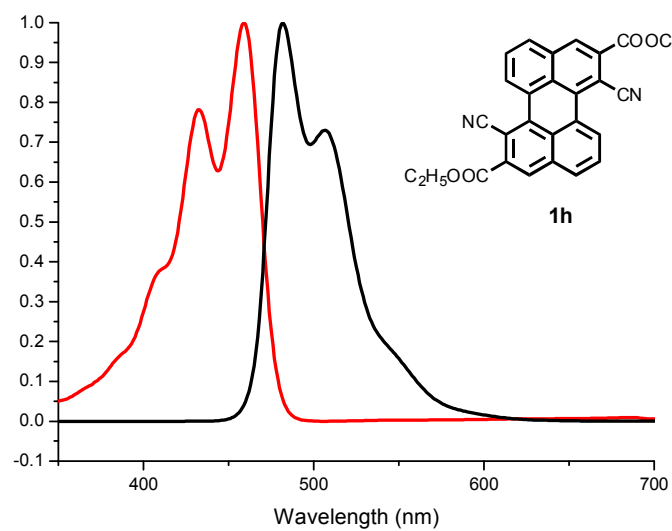

UV and PL spectrum of diethyl 1,7-dicyanoperylene-2,8-dicarboxylate (**1h**)

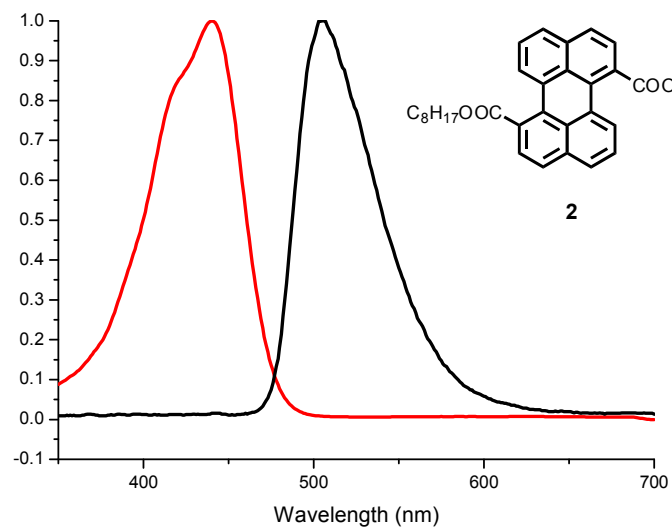

UV and PL spectrum of dioctyl perylene-1,7-dicarboxylate (**2**)

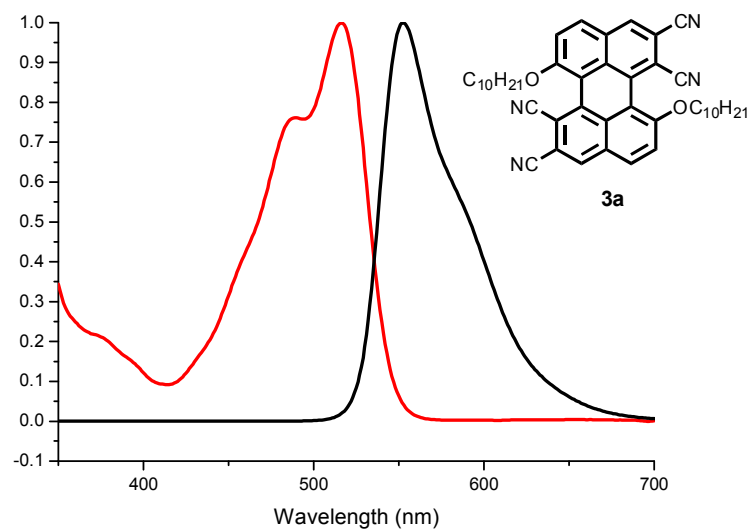

UV and PL spectrum of 6,12-bis(decyloxy)perylen-12,7,8-tetracyanonitrile (**3a**)

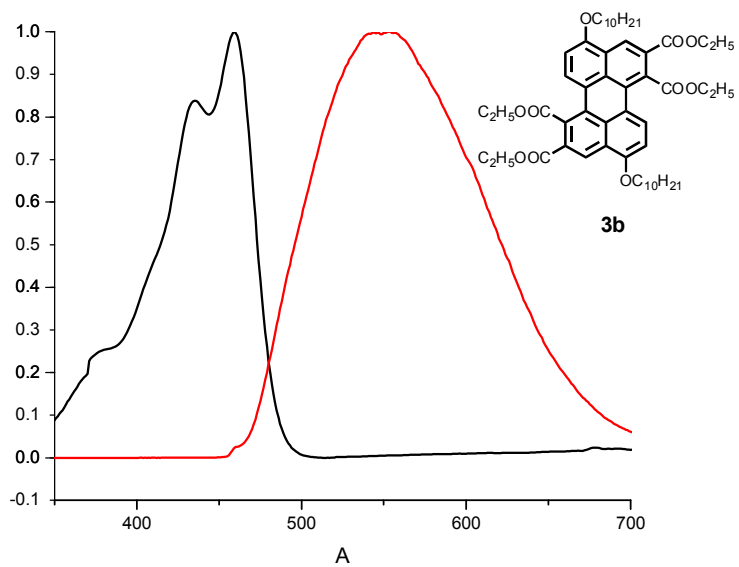

UV and PL spectrum of diethyl 4,10-bis(decyloxy)-7,8-bis(propionyloxy)perylen-1,2-dicarboxylate (**3b**)

#### 4. Electrochemical Analysis:

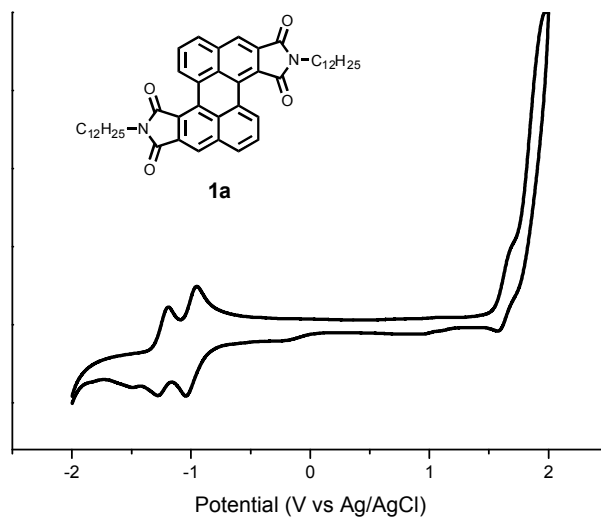

Cyclic voltammogram of perylene-1,2,7,8-bis(1'-dodecyl-1H-pyrrole-2,5'-dione) (**1a**)

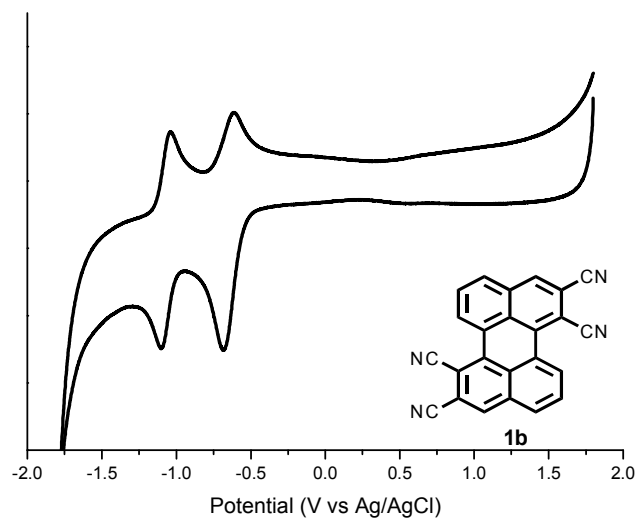

Cyclic voltammogram of perylene-1,2,7,8-tetracarbonitrile (**1b**)

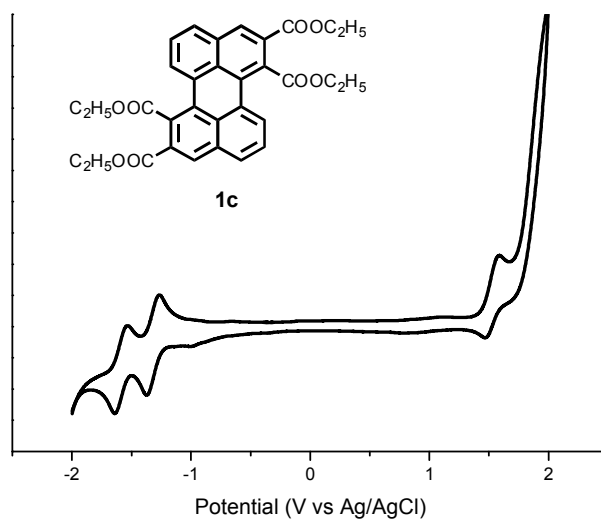

Cyclic voltammogram of tetraethyl perylene-1,2,7,8-tetracarboxylate (**1c**)

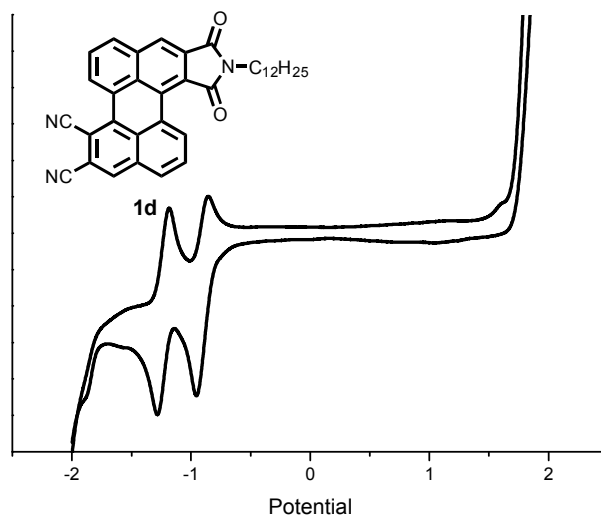

Cyclic voltammogram of perylene-7,8-dicarbonitrile1,2-(1'-dodecyl-1H-pyrrole-2',5-dione) (**1d**)

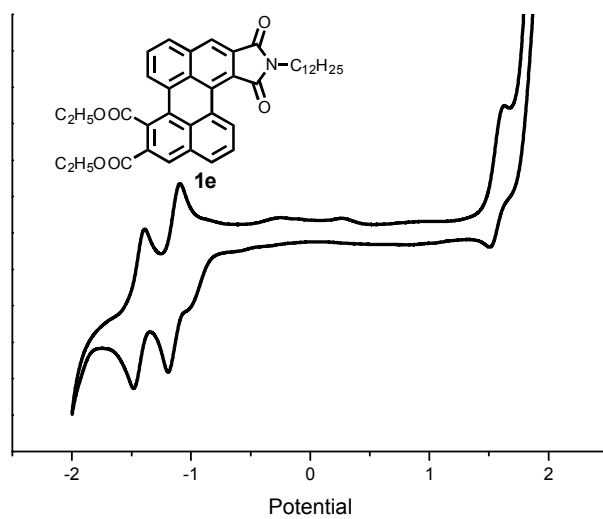

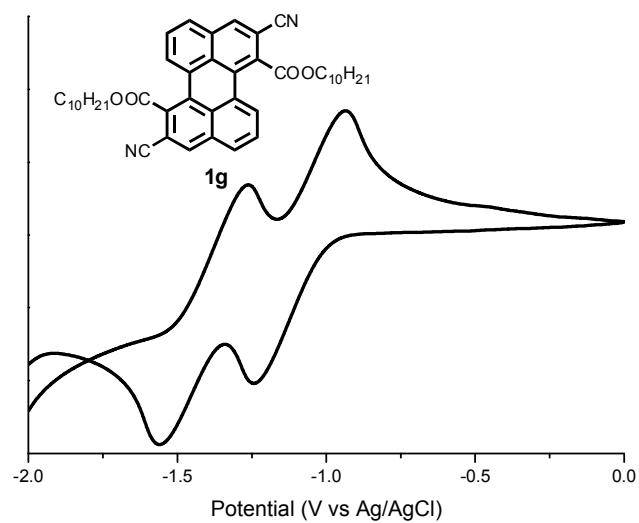

Cyclic voltammogram of didecyl 2,8-dicyanoperylene-1,7-dicarboxylate (**1g**)

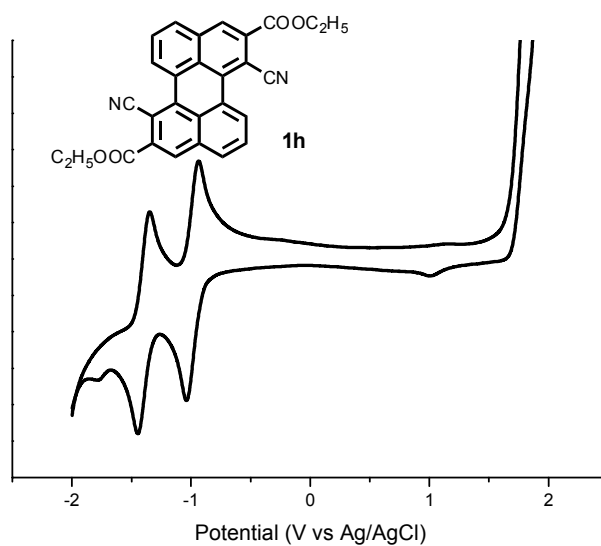

Cyclic voltammogram of diethyl 1,7-dicyanoperylene-2,8-dicarboxylate (**1h**)

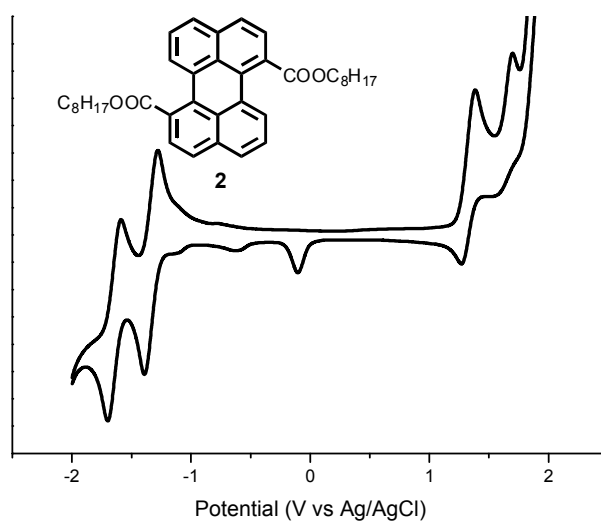

Cyclic voltammogram of dioctyl perylene-1,7-dicarboxylate (**2**)

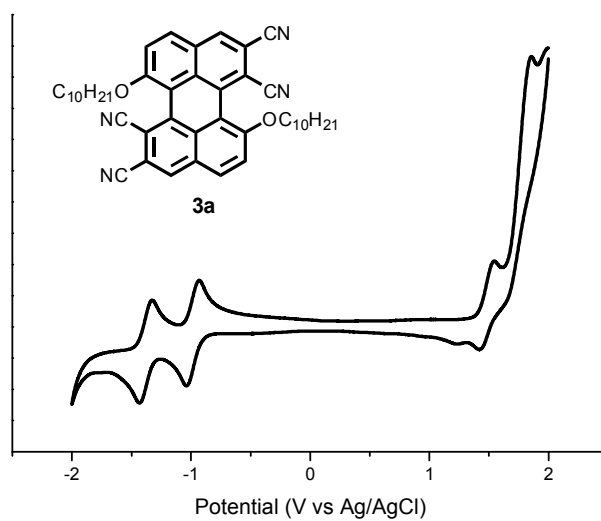

Cyclic voltammogram of 6,12-bis(decyloxy)perylen-12,7,8-tetracarbonitrile (**3a**)



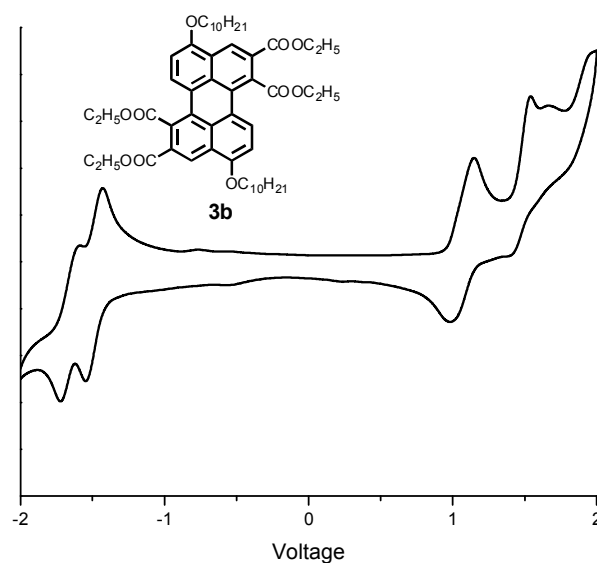

Cyclic voltammogram of diethyl 4,10-bis(decyloxy)-7,8-bis(propionyloxy)perylene-1,2-dicarboxylate (**3b**)

**Table 1.**

| Compound  | UV (nm) | PL (nm) | E <sub>red</sub> (V) | E <sub>ox</sub> (V) | Quantum Yield | LUMO (eV) | HOMO (eV) | E <sub>gop</sub> (eV) |
|-----------|---------|---------|----------------------|---------------------|---------------|-----------|-----------|-----------------------|
| <b>1a</b> | 482     | 500     | -0.998               | 1.625               | 0.36          | -3.326    | -5.925    | 2.44                  |
| <b>1b</b> | 457     | 475     | -0.648               | --                  | 0.38          | -3.556    | -6.136    | 2.58                  |
| <b>1c</b> | 429     | 486     | -1.319               | 1.52                | 0.07          | -3.005    | -5.827    | 2.75                  |
| <b>1d</b> | 468     | 487     | -0.905               | --                  | 0.55          | -3.408    | -5.928    | 2.52                  |
| <b>1e</b> | 463     | 497     | -1.143               | 1.570               | 0.18          | -3.170    | -5.869    | 2.53                  |
| <b>1f</b> | 451     | 504     | -1.043               | --                  | 0.35          | -3.270    | -5.880    | 2.61                  |
| <b>1g</b> | 433     | 486     | -1.088               | --                  | 0.17          | -3.236    | -5.876    | 2.64                  |
| <b>1h</b> | 459     | 480     | -0.987               | --                  | 0.67          | -3.312    | -5.882    | 2.57                  |
| <b>2</b>  | 440     | 503     | -1.335               | 1.326               | 0.24          | -2.964    | -5.625    | 2.56                  |
| <b>3a</b> | 516     | 552     | -0.974               | 1.472               | 0.83          | -3.361    | -5.771    | 2.26                  |
| <b>3b</b> | 459     | 550     | -1.487               | 1.067               | 0.54          | -2.859    | -5.377    | 2.55                  |

Conditions: Potentials versus Fc/Fc<sup>+</sup>, Working electrode: C, Counter electrode: Pt, Reference electrode: Ag/AgCl (for compound 1, Ag/AgNO<sub>3</sub>), Scan rate 100 mV/sec. Measure in 0.1 M Bu<sub>4</sub>NPF<sub>6</sub> CH<sub>2</sub>Cl<sub>2</sub> solution.

**Crystallographic information (X-ray crystal packing structure of 3a):**

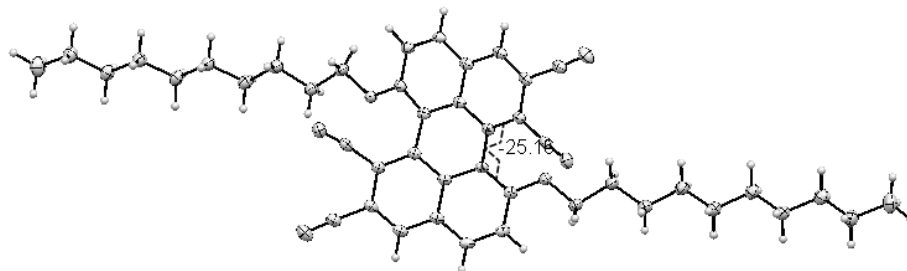

Figure 1. Single-crystal structure of **3a**

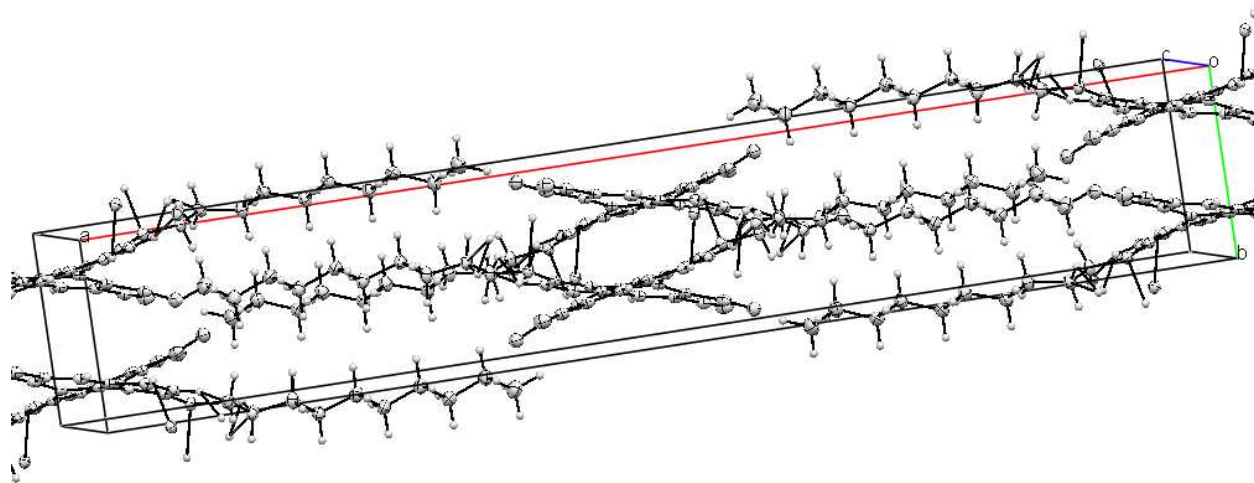

Figure 2. Crystal packing of **3a**

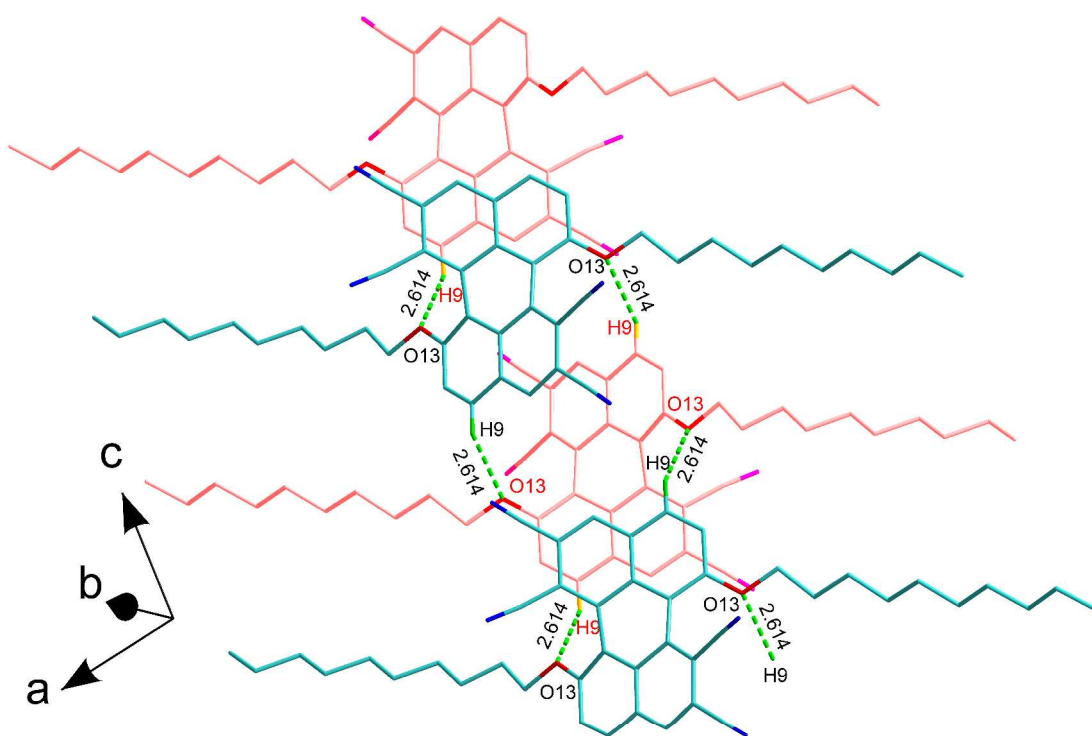

Figure 3. Hydrogen bonded network

**Table 2.**

|                                                  | <b>1</b>      |
|--------------------------------------------------|---------------|
| Empirical Formula                                | C44 H48 N4 O2 |
| Formula weight                                   | 664.86        |
| Temperature (K)                                  | 100.0(1) K    |
| Wavelength (Å)                                   | 0.71073 Å     |
| Crystal system                                   | Monoclinic    |
| Space group                                      | C2/c          |
| <i>a</i> , Å                                     | 41.6679(13)   |
| <i>b</i> , Å                                     | 6.9812(2)     |
| <i>c</i> , Å                                     | 12.1463(3)    |
| $\alpha$ (°)                                     | 90.00         |
| $\beta$ (°)                                      | 92.385(2)     |
| $\gamma$ (°)                                     | 90.00         |
| <i>V</i> , Å <sup>3</sup>                        | 3530.20(17)   |
| <i>Z</i>                                         | 4             |
| $\rho_{\text{calc}}$ Mg/m <sup>3</sup>           | 1.251         |
| $\mu$ , mm <sup>-1</sup>                         | 0.077         |
| <i>F</i> (000)                                   | 1424          |
| <i>T</i> (min.)                                  | 0.7454        |
| <i>T</i> (max.)                                  | 0.6974        |
| Data / parameter                                 | 3121/ 323     |
| Reflection (Unique)                              | 3121          |
| GOOF on <i>F</i> <sup>2</sup>                    | 1.111         |
| <i>R</i> <sub>Final</sub> <i>R</i> 1 =           | 0.0426        |
| <i>I</i> > 2 $\sigma$ ( <i>I</i> ) <i>wR</i> 2 = | 0.1089        |
| <i>R</i> <sub>all</sub> <i>R</i> 1 =             | 0.0548        |
| (all data) <i>wR</i> 2 =                         | 0.1248        |

**References:**

- (1) de Mello, J.C.; Wittmann, H. F.; Friend, R. H. *Adv. Mater.* **1997**, *9*, 230.  
(2) Kendall, J. K.; Shechter, H. *J. Org. Chem.* **2001**, *66*, 6643.
